# Supplementary material for: Development of highly efficient supramolecular CO2reduction photocatalysts with high turnover frequency and durability
Source: Royal Society of Chemistry journal article supplement (doi:10.1039/c1fd00091h), 2011-07-07
Supplement: c1fd00091h.pdf [file c1fd00091h.pdf]

# Development of highly efficient supramolecular CO<sub>2</sub> reduction photocatalysts with high turnover frequency and durability

Yusuke Tamaki,<sup>a</sup> Katsuhiro Watanabe,<sup>a</sup> Kazuhide Koike,<sup>b</sup> Haruo Inoue,<sup>c</sup> Tatsuki Morimoto<sup>a</sup> and Osamu Ishitani<sup>\*a</sup>

<sup>a</sup> *Department of Chemistry, Graduate School of Science and Engineering, Tokyo Institute of Technology, O-okayama 2-12-1-E1-9, Meguro-ku, Tokyo, 152-8551, Japan. E-mail: ishitani@chem.titech.ac.jp*

<sup>b</sup> *National Institute of Advanced Industrial Science and Technology, Onagawa 16-1, Tsukuba, 305-8569, Japan.*

<sup>c</sup> *Department of Applied Chemistry, Graduate School of Urban Environmental Science, Tokyo Metropolitan University, 1-1 Minami-ohsawa, Hachiohji-city, Tokyo, 192-0397, Japan.*

Electronic Supplementary Information

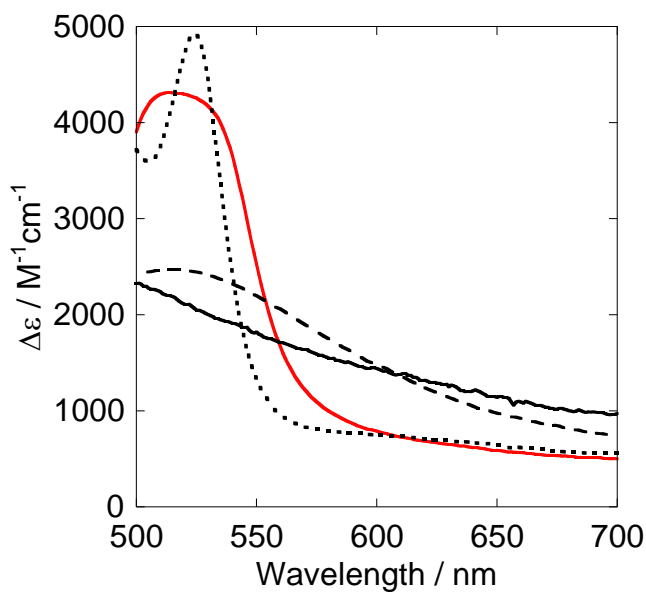

**Figure S1.** UV-Vis absorption spectra of the OER species in an Ar-saturated  $\text{CH}_3\text{CN}$  solution containing 0.1 M  $\text{Et}_4\text{NBF}_4$  at room temperature obtained by flow electrolysis method: **Ru** (red line), **Re(FPh)<sup>a</sup>** (black solid line), **Re(Ph)<sup>a</sup>** (black broken line), and **Re(OEt)** (black dotted line). <sup>a</sup>H. Tsubaki, A. Sugawara, H. Takeda, B. Gholamkhass, K. Koike and O. Ishitani, *Res. Chem. Intermed.*, 2007, **33**, 37-48.

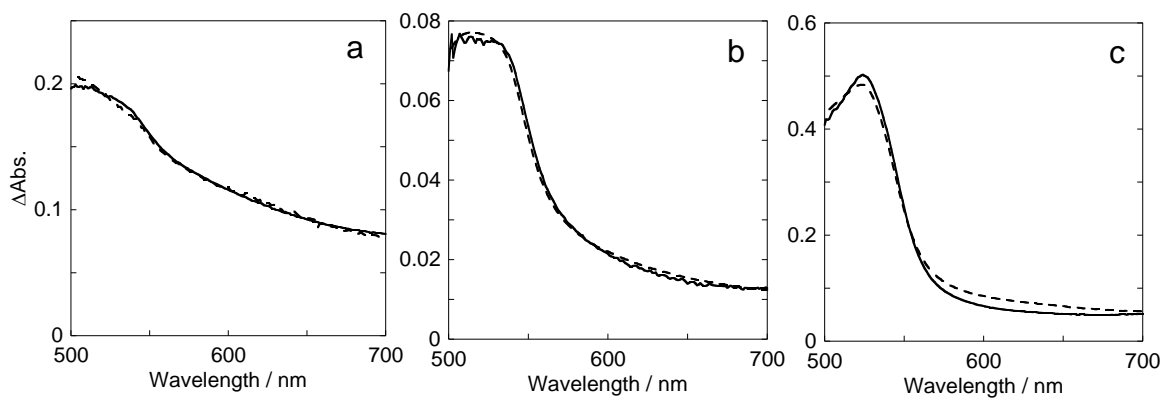

**Figure S2.** UV-Vis absorption spectra of the reaction solutions during irradiation (solid line): (a, 400 s) **Ru-Re(FPh)**; (b, 680 s) **Ru-Re(Ph)**; (c, 1490 s) **Ru-Re(OEt)**, and simulated spectrum using the spectra of the OER species of the corresponding mononuclear complexes shown in Figure S1 (broken line). The reaction condition was same to that in Figure 2.

**Video S1.** Vigorous production of CO bubbles: a CO<sub>2</sub> saturated DMF - TEOA (5:1 v/v) solution containing BNAH (0.1 M) and **Ru-Re(FPh)** (0.3 mM) was irradiated at > 420 nm using a 500-W high pressure mercury lamp.

**Video S2.** Observation of the solution containing **Ru** instead of **Ru-Re(FPh)** during irradiation: a CO<sub>2</sub> saturated DMF - TEOA (5:1 v/v) solution containing BNAH (0.1 M) and **Ru** (0.3 mM) was irradiated at > 420 nm using a 500-W high pressure mercury lamp.
